# Supplementary material for: Trade-off between local survival and fast expansion: a case study of two parthenogenetic lizard species and their patrilineal ancestors
Source: Research Square preprint supplement (doi:10.21203/rs.3.rs-8561715/v1), 2026-01-19
Supplement: Supplementary file 1 [file 8b3d18a247e2719770ad80ae.xlsx]

## Sheet: MODEL
	b0	b1	b2	b3	b4	b5		K=1000
	p01							SY (successful years) = 0.5
		p12
			p23
				p34
					p45	0
YEARS							Periods (years)	0	1	2	3	4	5	6	7	8	9	10	11	12	13	14	15	16	17	18	19	20	21	22	23	24	25	26	27	28	29	30	31	32	33	34	35	36	37	38	39	40	41
parthenogen age	0	0	4	4	4	4		10	0	0	0	40	0	0	160	160	0	640	1280	0	0	6560	0	0	4000	4000	0	0	8000	0	0	0	0	0	0	0	0	0	0	0	0	0	0	0	0	0	0	0	0
2	1	0	0	0	0	0		0	10	0	0	0	40	0	0	160	160	0	640	1280	0	0	6560	0	0	4000	4000	0	0	8000	0	0	0	0	0	0	0	0	0	0	0	0	0	0	0	0	0	0	0
3	0	1	0	0	0	0		0	0	10	0	0	0	40	0	0	160	160	0	640	1000	0	0	1000	0	0	1000	1000	0	0	1000	0	0	0	0	0	0	0	0	0	0	0	0	0	0	0	0	0	0
4	0	0	1	0	0	0		0	0	0	10	0	0	0	40	0	0	160	160	0	640	1000	0	0	1000	0	0	1000	1000	0	0	1000	0	0	0	0	0	0	0	0	0	0	0	0	0	0	0	0	0
5	0	0	0	0	0	0		0	0	0	0	0	0	0	0	0	0	0	0	0	0	0	0	0	0	0	0	0	0	0	0	0	0	0	0	0	0	0	0	0	0	0	0	0	0	0	0	0	0
6	0	0	0	0	0	0		0	0	0	0	0	0	0	0	0	0	0	0	0	0	0	0	0	0	0	0	0	0	0	0	0	0	0	0	0	0	0	0	0	0	0	0	0	0	0	0	0	0
							Population size	0	0	10	10	0	0	40	40	0	160	320	160	640	1640	1000	0	1000	1000	0	1000	2000	1000	0	1000	1000	0	0	0	0	0	0	0	0	0	0	0	0	0	0	0	0	0
YEARS
sexual breeder age	0	0	2	2	2	2		10	0	0	0	20	0	0	40	40	40	80	160	0	0	560	0	320	1120	1120	1760	0	4640	0	0	0	0	0	0	0	0	0	0	0	0	0	0	0	0	0	0	0	0
2	1	0	0	0	0	0		0	10	0	0	0	20	0	0	40	40	40	80	160	0	0	560	0	320	1120	1120	1760	0	4640	0	0	0	0	0	0	0	0	0	0	0	0	0	0	0	0	0	0	0
3	0	1	0	0	0	0		0	0	10	0	0	0	20	0	0	40	40	40	80	160	0	0	560	0	320	1000	1000	1000	0	1000	0	0	0	0	0	0	0	0	0	0	0	0	0	0	0	0	0	0
4	0	0	1	0	0	0		0	0	0	10	0	0	0	20	0	0	40	40	40	80	160	0	0	560	0	320	1000	1000	1000	0	1000	0	0	0	0	0	0	0	0	0	0	0	0	0	0	0	0	0
5	0	0	0	1	0	0		0	0	0	0	10	0	0	0	20	0	0	40	40	40	80	160	0	0	560	0	320	1000	1000	1000	0	1000	0	0	0	0	0	0	0	0	0	0	0	0	0	0	0	0
6	0	0	0	0	0	0		0	0	0	0	0	0	0	0	0	0	0	0	0	0	0	0	0	0	0	0	0	0	0	0	0	0	0	0	0	0	0	0	0	0	0	0	0	0	0	0	0	0
							Population size	0	0	10	10	10	0	20	20	20	40	80	120	160	280	240	160	560	560	880	1320	2320	3000	2000	2000	1000	1000	0	0	0	0	0	0	0	0	0	0	0	0	0	0	0	0
								0	1	1	0	1	0	0	1	1	1	1	1	0	0	1	0	1	1	1	1	0	1	0	0	0	0	0	1	0	1	0	1	0	1	0	1	0	1	0	1	1	0
																												2384
																												864
									1
									1
									1
									1
									1
									1																						#DIV/0!	#DIV/0!
									1																						#DIV/0!	#DIV/0!
									1																						0	#DIV/0!
																															#DIV/0!	0
																															#DIV/0!	#DIV/0!
									0	0	0	0	0	0	0	0	0	0	0	128	0	0	656	0	0	400	400	0	0	800	0	0	0	0	0	0	0	0	0	0	0	0	0	0	0	0	0	0	0
									0	0	0	0	0	0	0	0	0	0	0	0	0	0	0	0	0	112	112	176	0	464	0	0	0	0	0	0	0	0	0	0	0	0	0	0	0	0	0	0	0
[truncated: 58 more columns]
